# Supplementary material for: Theaflavin-Enriched Fraction Stimulates Adipogenesis in Human Subcutaneous Fat Cells
Source: PubMed Central journal article supplement (PMC6515531; doi:10.3390/ijms20082034), 2019-04-25
Supplement: ijms-20-02034-s001.pdf [file ijms-20-02034-s001.pdf]

**[Supplemental Information]**

**The theaflavin-enriched fraction stimulates adipogenesis  
in human subcutaneous fat cells**

Phil June Park, Chan-Su Rha, Sung Tae Kim

**Supplemental Figure 1. Chemical structure of (-)-epicatechins and theaflavins.** (A) (-)-epicatechin, (B) (-)-epigallocatechin, (C) (-)-epicatechingallate, (D) (-)-epigallocatechin gallate, (E) theaflavin, (F) theaflavin 3,3'-di-*O*-gallate.

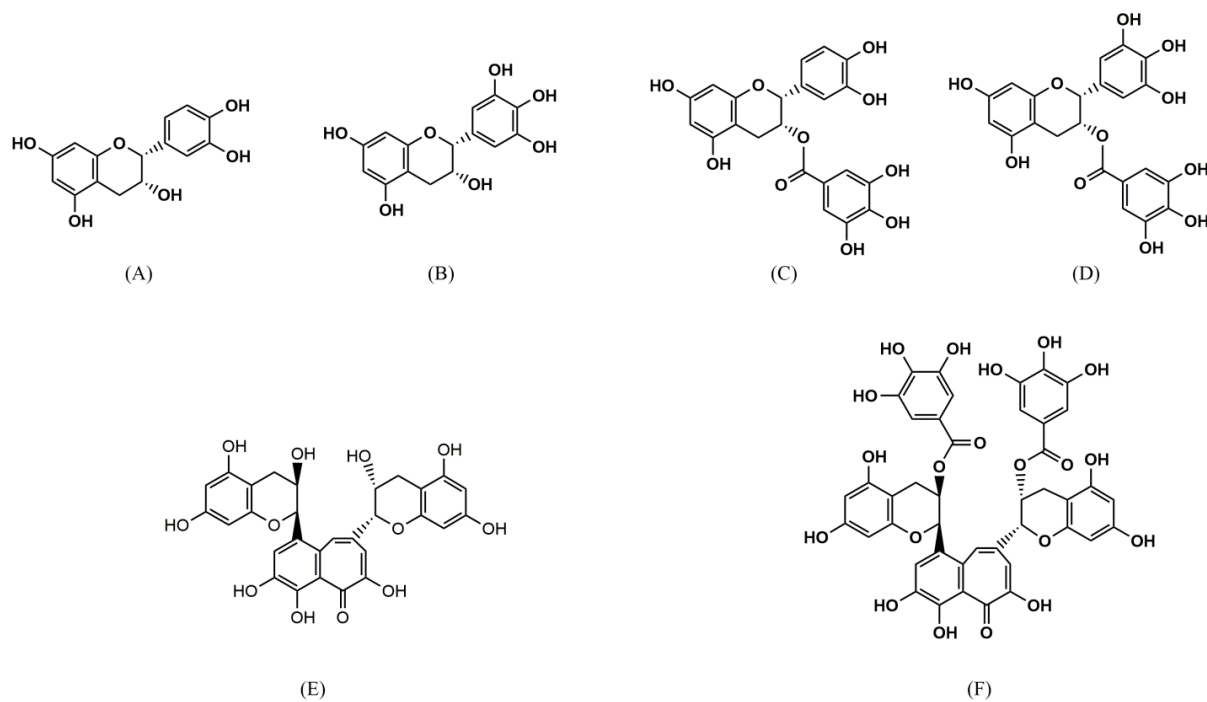

**Supplemental Figure 2.** Preparative chromatography of CoF-GT for obtaining TF-enriched fraction (the 4th fraction).

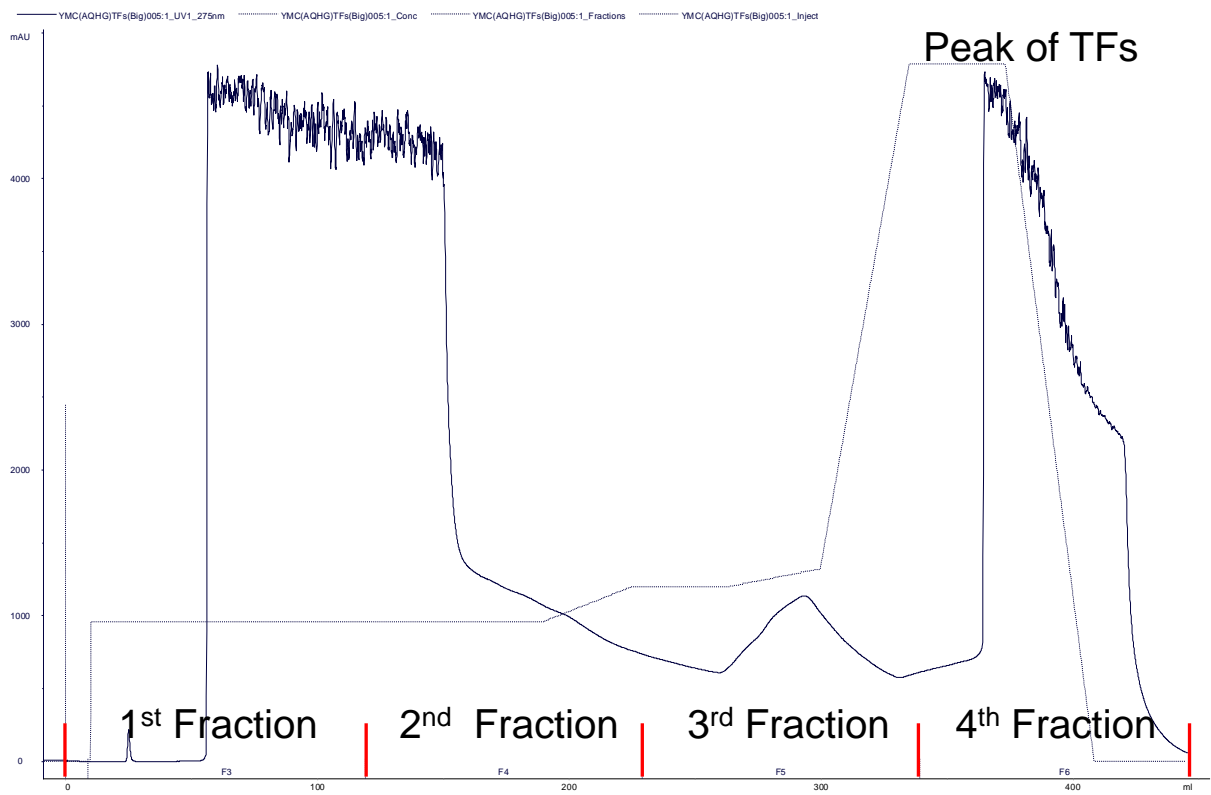

**Table 1. The contents of theaflavins in samples.**

| Sample                 | TF                    | TF3G                  | TF3'G               | TFDG                  | Sum                  |
|------------------------|-----------------------|-----------------------|---------------------|-----------------------|----------------------|
| * CoF-GT rich fraction | 21.56±0.96<br>(41.0%) | 20.70±0.93<br>(39.4%) | 4.11±0.2<br>(7.8%)  | 6.21±0.22<br>(11.8%)  | 52.57±2.30<br>(100%) |
| # F-GT richfraction    | 7.04±0.29<br>(19.2%)  | 15.49±0.71<br>(42.3%) | 3.18±0.16<br>(8.7%) | 10.89±0.52<br>(29.8%) | 36.61±1.67<br>(100%) |

\* Data shown: **theaflavins mg/g of fraction of extract** (mean ± SEM, n=3)

# Lower data shown: theaflavins % (w/w) of fraction of extract (mean, n=3)
